# Supplementary material
Source: PubMed Central journal article supplement (PMC4681119)
Supplement: NIHMS63141-supplement-1.pdf [file NIHMS63141-supplement-1.pdf]

## Generation and structural characterization of aluminum cyanoacetylide

*Carlos Cabezas,<sup>a)</sup> Carmen Barrientos,<sup>b)</sup> Antonio Largo,<sup>b)</sup> Jean-Claude Guillemin,<sup>c)</sup> José Cernicharo,<sup>d)</sup> Isabel Peña,<sup>a)</sup> José L. Alonso<sup>a)</sup>*

<sup>a)</sup> *Grupo de Espectroscopia Molecular (GEM). Edificio Quifima. Laboratorios de Espectroscopia y Bioespectroscopia. Unidad Asociada CSIC, Parque Científico Uva, Universidad de Valladolid, Paseo de Belén 5, 47011 Valladolid, Spain*

<sup>b)</sup> *Departamento de Química Física y Química Inorgánica, Facultad de Ciencias, Universidad de Valladolid Campus Miguel Delibes, Paseo de Belén 7, 47011 Valladolid, Spain*

<sup>c)</sup> *Institut des Sciences Chimiques de Rennes, École Nationale Supérieure de Chimie de Rennes, CNRS, UMR 6226, 11 Allée de Beaulieu, CS 50837, 35708 Rennes Cedex 7, France*

<sup>d)</sup> *Group of Molecular Astrophysics. ICMM C/Sor Juana Ines de la Cruz N3 Cantoblanco, 28049 Madrid, Spain*

## Supplementary Material

**Page 2:** Table S1, with the anharmonic vibrational frequencies ( $\omega$ ,  $\text{cm}^{-1}$ ) and IR intensities (I,  $\text{km/mol}$ ) for AlCCCN evaluated at the MP2/aug-cc-pVTZ level.

**Page 3:** Figure S1, with the contour maps of the Laplacian distribution of the electron density for the AlCN, AlCCCN and AlCCH species.

**Table S1.** Anharmonic vibrational frequencies ( $\omega$ ,  $\text{cm}^{-1}$ ) and IR intensities ( $I$ ,  $\text{km/mol}$ ) for AlCCCN evaluated at the MP2/aug-cc-pVTZ level.

| Symmetry / Mode                                           | $\omega$ | $I$    |
|-----------------------------------------------------------|----------|--------|
| 1 $\pi$ AlC <sub>1</sub> C <sub>2</sub> bend              | 69       | 0.77   |
| 2 $\pi$ C <sub>1</sub> C <sub>2</sub> C <sub>3</sub> bend | 247      | 3.25   |
| 3 $\sigma$ Al-C <sub>1</sub> stretch                      | 386      | 120.08 |
| 4 $\pi$ C <sub>2</sub> C <sub>3</sub> N bend              | 511      | 2.64   |
| 5 $\sigma$ C <sub>2</sub> -C <sub>3</sub> stretch         | 918      | 107.86 |
| 6 $\sigma$ C <sub>1</sub> -C <sub>2</sub> stretch         | 1966     | 53.49  |
| 7 $\sigma$ C <sub>3</sub> -N stretch                      | 2132     | 11.40  |

**Figure S1.** Contour maps of the Laplacian distribution of the electron density for the AICN, AICCCN and AICCH species.

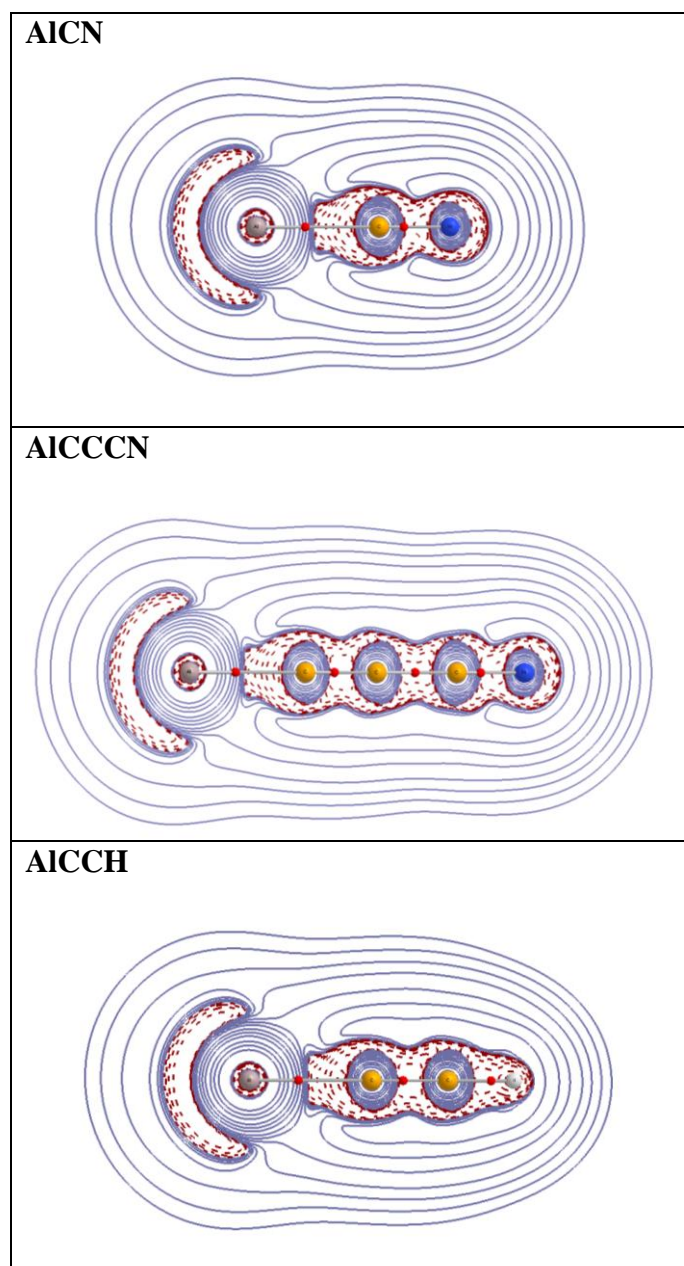

Red dashed lines indicate regions of electronic charge concentration ( $\nabla^2\rho(r) < 0$ ), and blue continuous lines denote regions of electronic charge depletion ( $\nabla^2\rho(r) > 0$ ). Also molecular graphs of electron density are shown. Small red spheres are bond critical points (BCPs)
